# Supplementary material for: Identification of functionally distinct macrophage subpopulations in Drosophila
Source: eLife. 2021 Apr 22;10:e58686. doi: 10.7554/eLife.58686 (PMC8062135; doi:10.7554/eLife.58686)
Supplement: Figure 2—figure supplement 2—source data 1. [file elife-58686-fig2-figsupp2-data1.csv]

crq-GAL4	UAS-GFP	simu-cyt-GFP
0.47015002	0.1249683
0.60011992	0.2024584
0.61235929	0.2142042
0.61898761	0.1818804
0.66647948
