# Supplementary material for: Identification of functionally distinct macrophage subpopulations in Drosophila
Source: eLife. 2021 Apr 22;10:e58686. doi: 10.7554/eLife.58686 (PMC8062135; doi:10.7554/eLife.58686)
Supplement: Figure 2—source data 1. [file elife-58686-fig2-data1.csv]

srp-GAL4	VT17559-GAL4	VT32897-GAL4	VT57089-GAL4	VT62766-GAL4
37	16	7	9	17
47	17	8	20	20
42	24	12	16	14
37	15	13	21	22
50	18	15	19	24
31	20	9	22	16
36	17	14	21	28
42	16	14	21	26
39	15	6	18	27
