# Supplementary material for: Identification of functionally distinct macrophage subpopulations in Drosophila
Source: eLife. 2021 Apr 22;10:e58686. doi: 10.7554/eLife.58686 (PMC8062135; doi:10.7554/eLife.58686)
Supplement: Figure 3—figure supplement 1—source data 1. [file elife-58686-fig3-figsupp1-data1.csv]

VT17559-DBD	VT32897-DBD	VT57089-DBD	VT62766-DBD
0.0000000	0.0000000	57.5342466	9.3750000
16.6666667	0.0000000	67.7966102	18.7500000
0.0000000	12.6984127	55.0000000	50.0000000
16.6666667	0.0000000	41.6666667	23.9130435
64.8648649	0.0000000		11.1111111
	10.7142857		30.1886792
			16.6666667
			48.8888889
			10.7142857
