# Supplementary material for: Identification of functionally distinct macrophage subpopulations in Drosophila
Source: eLife. 2021 Apr 22;10:e58686. doi: 10.7554/eLife.58686 (PMC8062135; doi:10.7554/eLife.58686)
Supplement: Figure 3—figure supplement 1—source data 2. [file elife-58686-fig3-figsupp1-data2.csv]

VT17559-DBD	VT32897-DBD	VT57089-DBD	VT62766-DBD
62.5000000	71.4285714	87.5000000	51.4285714
44.0000000	65.7894737	75.8620690	54.8387097
86.9565217	77.4193548	80.6451613	44.1860465
49.0196078	24.3902439	68.4210526	58.5365854
38.7096774	63.4146341	71.8750000	55.8823529
86.6666667	42.8571429	59.3750000	51.4285714
97.0588235	52.9411765	58.6206897	54.0540541
90.0000000	51.6129032	78.5714286	71.8750000
80.7692308	80.0000000	72.7272727	31.0344828
	72.2222222	87.5000000	50.0000000
	66.6666667	71.4285714	68.9655172
	58.0645161	85.2941176	78.1250000
	80.0000000	90.3225806	92.5925926
	68.5714286	67.7419355	45.7142857
		34.3750000	54.2857143
			68.0000000
			53.1250000
			78.5714286
			53.3333333
			51.2195122
			41.8604651
