# Supplementary material for: Identification of functionally distinct macrophage subpopulations in Drosophila
Source: eLife. 2021 Apr 22;10:e58686. doi: 10.7554/eLife.58686 (PMC8062135; doi:10.7554/eLife.58686)
Supplement: Figure 4—figure supplement 1—source data 1. [file elife-58686-fig4-figsupp1-data1.csv]

UAS-stinger;+	UAS-stinger;VT17559-GAL4	UAS-stinger;VT32897-GAL4	UAS-stinger;VT57089-GAL4	UAS-stinger;VT62766-GAL4
0.00000000	0.97847358	11.72227230	0.17331023	1.44761905
0.00000000	15.49003320	20.72617250	0.00000000	0.06784261
0.00000000	0.97847358	11.78743960	0.00000000	0.00000000
0.13166557	8.44529750	2.80701754	0.09789525	0.09955202
0.10136847	18.70286580	7.91693705	1.61764706	0.39277298
0.00000000	0.57142857	8.67224880	0.00000000	0.11855365
0.00000000	5.47219771	9.67514124	1.77304965	0.32379924
0.00000000			0.04280822	1.81180596
