# Supplementary material for: Identification of functionally distinct macrophage subpopulations in Drosophila
Source: eLife. 2021 Apr 22;10:e58686. doi: 10.7554/eLife.58686 (PMC8062135; doi:10.7554/eLife.58686)
Supplement: Figure 4—figure supplement 1—source data 2. [file elife-58686-fig4-figsupp1-data2.csv]

	historical expression only (VT + srp OFF)	historical expression only (VT + srp OFF)	historical expression only (VT + srp OFF)	historical expression only (VT + srp OFF)	historical expression only (VT + srp OFF)	historical expression only (VT + srp OFF)	historical expression only (VT + srp OFF)	historical expression only (VT + srp OFF)	historical expression only (VT + srp OFF)	historical expression only (VT + srp OFF)	current expression only (VT + srp ON)	current expression only (VT + srp ON)	current expression only (VT + srp ON)	current expression only (VT + srp ON)	current expression only (VT + srp ON)	current expression only (VT + srp ON)	current expression only (VT + srp ON)	current expression only (VT + srp ON)	current expression only (VT + srp ON)	current expression only (VT + srp ON)	historical and current expression	historical and current expression	historical and current expression	historical and current expression	historical and current expression	historical and current expression	historical and current expression	historical and current expression	historical and current expression	historical and current expression
srp-AD;srp-DBD	95.6790123	57.2992701	98.3050847	73.4883721	84.9462366	93.3333333	77.2300469	65.7142857	80.4347826	88.8198758	1.85185185	14.23357660	0.00000000	10.69767440	5.37634409	2.00000000	10.56338030	16.66666670	4.34782609	0.62111801	2.4691358	28.4671533	1.6949153	15.8139535	9.6774194	4.6666667	12.2065728	17.6190476	15.2173913	10.5590062
srp-AD;VT17559-DBD	10.4166667	12.4497992	18.7763713	9.5238095	3.6363636	0.0000000		0.0000000			2.08333333	2.40963855	0.00000000	0.00000000	3.63636364	0.00000000		0.00000000			87.5000000	85.1405622	81.2236287	90.4761905	92.7272727	100.0000000		100.0000000
srp-AD;VT32897-DBD	35.8974359	49.6296296	56.5217391	32.2314050	57.8347578	33.2518337	13.2246377	44.4743935	18.8340807		0.51282051	0.74074074	1.63043478	0.41322314	2.56410256	0.00000000	1.26811594	1.61725067	1.79372197		63.5897436	49.6296296	41.8478261	67.3553719	39.6011396	66.7481663	85.5072464	53.9083558	79.3721973
srp-AD;VT57089-DBD	16.5413534	33.3333333	40.0000000	9.6000000	8.8888889	10.9890110	9.4339623	31.9230769	15.2542373	14.9038462	0.75187970	0.00000000	0.00000000	1.60000000	0.00000000	10.98901100	4.40251572	2.30769231	1.69491525	2.40384615	82.7067669	66.6666667	60.0000000	88.8000000	91.1111111	78.0219780	86.1635220	65.7692308	83.0508475	82.6923077
srp-AD;VT62766-DBD	19.2771084	19.5266272	55.3846154	64.2857143	15.7894737	13.0434783	7.4074074	18.5185185	18.7500000		1.20481928	0.00000000	0.00000000	0.00000000	10.52631580	0.00000000	11.11111110	0.00000000	2.08333333		79.5180723	80.4733728	44.6153846	35.7142857	73.6842105	86.9565217	81.4814815	81.4814815	79.1666667
