# Supplementary material for: Identification of functionally distinct macrophage subpopulations in Drosophila
Source: eLife. 2021 Apr 22;10:e58686. doi: 10.7554/eLife.58686 (PMC8062135; doi:10.7554/eLife.58686)
Supplement: Figure 4—source data 1. [file elife-58686-fig4-data1.csv]

VT17559-DBD Bleed	VT17559-DBD Scrape	VT32897-DBD Bleed	VT32897-DBD Scrape	VT57089-DBD Bleed	VT57089-DBD Scrape	VT62766-DBD Bleed	VT62766-DBD Scrape
0.83333333	0.81351690	9.83606557	12.70860080	3.19148936	1.68243954	9.03225806	8.46702317
1.71821306	1.26227209	15.08379890	11.69960470	0.00000000	0.34246575	0.00000000	1.57185629
4.18848168	3.98912058	18.96551720	7.88643533	2.28571429	1.28720837	3.64145658	1.64383562
2.58899676	0.73710074	10.36269430	9.58904110	0.28985507	0.00000000	8.40336134	4.98915401
0.10989011	2.19023780	7.92079208	12.50849760	3.27868852	1.52224824	5.33807829	4.37710438
10.46643910	9.75308642	8.91265597	6.57084189	6.99300699	5.51948052	3.50515464	3.05927342
1.56555773	0.57915058	12.25490200	8.04749340	2.09205021	0.66115702	1.99275362	1.12500000
0.39603960	0.68819481	5.82524272	6.59824047	0.69156293	0.57471264	2.61233020	4.51388889
1.75438596	0.83565460	14.03508770	7.84313725	0.37064492	0.30349014	1.61427358	1.01302460
1.76600442	0.70339977	10.18437230	6.86080948	3.31262940	0.98191214	2.04978038	1.06951872
