# Supplementary material for: Identification of functionally distinct macrophage subpopulations in Drosophila
Source: eLife. 2021 Apr 22;10:e58686. doi: 10.7554/eLife.58686 (PMC8062135; doi:10.7554/eLife.58686)
Supplement: Figure 4—source data 2. [file elife-58686-fig4-data2.csv]

hml(Δ)-GAL4 ant (MGV)	hml(Δ)-GAL4 med (MGV)	hml(Δ)-GAL4 post (MGV)	VT17559-DBD ant	VT17559-DBD med	VT17559-DBD post	VT32897-DBD ant	VT32897-DBD med	VT32897-DBD post	VT57089-DBD ant	VT57089-DBD med	VT57089-DBD post	VT62766-DBD ant	VT62766-DBD med	VT62766-DBD post
0.16282395	0.25455814	0.58261791	0.23333333	0.33333333	0.43333333	0.26470588	0.35294118	0.38235294	0.09090909	0.45454545	0.45454545	0.00000000	0.22222222	0.77777778
0.25584313	0.22797599	0.51618088	0.06250000	0.43750000	0.50000000	0.20000000	0.20000000	0.60000000	0.21428571	0.28571429	0.50000000	0.00000000	0.30769231	0.69230769
0.17265533	0.26566534	0.56167933	0.25000000	0.66666667	0.08333333	0.31111111	0.13333333	0.55555556	0.00000000	0.41666667	0.58333333	0.33333333	0.27777778	0.38888889
0.25910047	0.24454257	0.49635697	0.00000000	0.42857143	0.57142857	0.05555556	0.61111111	0.33333333	0.00000000	0.41379310	0.58620690	0.06666667	0.13333333	0.80000000
0.20454831	0.24143562	0.55401607	0.21875000	0.00000000	0.78125000	0.10000000	0.16666667	0.73333333	0.16666667	0.41666667	0.41666667	0.07142857	0.21428571	0.71428571
0.24090102	0.31310661	0.44599237	0.18750000	0.25000000	0.56250000	0.10000000	0.30000000	0.60000000	0.28571429	0.28571429	0.42857143	0.37500000	0.37500000	0.25000000
0.19857070	0.23801710	0.56341220	0.15909091	0.43181818	0.40909091	0.21739130	0.39130435	0.39130435	0.10000000	0.60000000	0.30000000	0.25000000	0.25000000	0.50000000
0.20792176	0.20588664	0.58619160	0.16129032	0.32258065	0.51612903	0.35000000	0.20000000	0.45000000	0.00000000	0.40000000	0.60000000	0.09090909	0.18181818	0.72727273
0.32307864	0.28582426	0.39109710	0.00000000	0.13333333	0.86666667	0.20000000	0.30000000	0.50000000	0.00000000	0.10000000	0.90000000	0.30000000	0.10000000	0.60000000
0.30938042	0.32081301	0.36980657	0.26470588	0.26470588	0.47058824	0.08333333	0.25000000	0.66666667	0.14285714	0.28571429	0.57142857	0.00000000	0.30769231	0.69230769
0.31850791	0.27831756	0.40317453	0.14285714	0.21428571	0.64285714	0.02500000	0.42500000	0.55000000	0.25000000	0.35000000	0.40000000	0.00000000	0.11111111	0.88888889
0.14807876	0.26623366	0.58568758	0.10000000	0.30000000	0.60000000	0.07692308	0.55769231	0.36538462	0.00000000	0.26666667	0.73333333	0.00000000	0.30769231	0.69230769
0.23460056	0.33409126	0.43130818				0.27272727	0.36363636	0.36363636	0.00000000	0.35714286	0.64285714	0.00000000	0.22222222	0.77777778
0.23946154	0.38016233	0.38037613				0.04545455	0.31818182	0.63636364				0.14285714	0.00000000	0.85714286
0.23660444	0.26092982	0.50246574				0.16071429	0.41071429	0.42857143
0.28450449	0.27467143	0.44082408				0.17241379	0.48275862	0.34482759
0.23002297	0.20817754	0.56179949				0.18421053	0.31578947	0.50000000
						0.09090909	0.40909091	0.50000000
						0.00000000	0.38636364	0.61363636
						0.13846154	0.38461538	0.47692308
