# Supplementary material for: Identification of functionally distinct macrophage subpopulations in Drosophila
Source: eLife. 2021 Apr 22;10:e58686. doi: 10.7554/eLife.58686 (PMC8062135; doi:10.7554/eLife.58686)
Supplement: Figure 7—source data 1. [file elife-58686-fig7-data1.csv]

srp-DBD	w neg con	VT17559	VT32987	VT57089	VT62766
85.4092527	0.00000000	1.72166428	4.04494382	15.09433960	7.21442886
	1.00000000	2.28536133	3.04031725	13.33333330	6.28019324
	2.85714286	2.04081633	5.49065421	10.19108280	6.57894737
	1.29870130	4.84375000	7.36842105	6.26262626	7.60330579
	2.47933884	5.24951393	11.27516780	11.33333330	6.13026820
