# Supplementary material for: Identification of functionally distinct macrophage subpopulations in Drosophila
Source: eLife. 2021 Apr 22;10:e58686. doi: 10.7554/eLife.58686 (PMC8062135; doi:10.7554/eLife.58686)
Supplement: Figure 8—figure supplement 1—source data 1. [file elife-58686-fig8-figsupp1-data1.csv]

srp-GAL4 +	VT17559-GAL4 -	VT17559-GAL4 +	VT32897-GAL4 -	VT32897-GAL4 +	VT57089-GAL4 -	VT57089-GAL4 +	VT62766-GAL4 -	VT62766-GAL4 +
550.183	603.216	511.690	623.574	550.183	731.353	345.062	513.230	791.914
713.048	936.987	534.786	692.518	713.048	774.635	473.198	501.426	1173.586
1155.110	721.259	464.131	615.192	1155.110	406.307	676.950	636.576	777.372
732.892	500.057	670.621	691.663	732.892	592.096	934.592	417.256	529.311
540.260	528.798	776.004	726.734	540.260	741.617	475.935	465.842	357.892
717.496	764.884	625.456	898.324	717.496	642.906	788.492	669.252	849.396
630.931	572.936	505.703	449.418	630.931	371.236	444.457	501.084	416.401
507.413	532.733	596.715	509.980	507.413	529.996	900.719	547.787	789.177
557.026	557.026	604.585	746.065	557.026	703.638	312.044	701.414	449.418
727.247	433.337	748.460	536.839	727.247	630.418	622.548	445.826	576.186
318.887	451.985	770.016	417.256	318.887	607.493	522.810	819.970	317.005
874.715	692.005	639.998	549.156	874.715	641.195	285.356	824.761	856.752
843.750	656.421	671.305	489.964	843.750	638.800		708.257	555.657
461.736	451.813	846.830	660.527	461.736	756.159		630.760	497.320
997.719	457.117	841.868	497.320	997.719	471.145		799.612	506.729
547.274	426.323		546.419	547.274	454.722		754.961
437.272	703.809		613.994	437.272	523.495		815.351
398.095	498.688		553.091	398.095			730.668
313.070	734.945		466.697	313.070	490.819		672.160
375.513	723.312		411.782	375.513	670.963		480.725
511.519	473.882		610.402	511.519	527.600		599.966
430.600	351.734		794.480	430.600	548.643
358.919	1100.365		844.948	358.919	834.341
496.636	725.194		896.784	496.636	454.722
	568.830		433.850		581.832
	1099.339		454.037		524.350
	511.519		587.819		864.108
	429.402		311.188
	537.865		595.176
	715.785		847.856
	628.536		1006.957
	641.538		728.444
	376.369		834.512
	860.173		588.162
	519.047		874.715
	604.927		642.393
	859.489		843.750
	778.228		461.736
	596.715		525.890
	570.883		529.311
	680.030		607.151
	723.996		650.776
	652.486		436.588
	692.347		539.063
	689.439		513.401
	715.443		590.043
	627.851		472.685
	711.850		805.429
	369.355		630.246
	981.809		521.271
	676.266		448.221
	773.438
	721.944
	806.798
