# Supplementary material for: Identification of functionally distinct macrophage subpopulations in Drosophila
Source: eLife. 2021 Apr 22;10:e58686. doi: 10.7554/eLife.58686 (PMC8062135; doi:10.7554/eLife.58686)
Supplement: Figure 8—figure supplement 1—source data 2. [file elife-58686-fig8-figsupp1-data2.csv]

srp-GAL4 +	VT17559-GAL4 -	VT17559-GAL4 +	VT32897-GAL4 -	VT32897-GAL4 +	VT57089-GAL4 -	VT57089-GAL4 +	VT62766-GAL4 -	VT62766-GAL4 +
0.812	0.737	0.752	0.384	0.737	0.706	0.748	0.680	0.701
0.700	0.687	0.814	0.631	0.631	0.931	0.517	0.579	0.572
0.686	0.511	0.743	0.450	0.851	0.597	0.821	0.830	0.759
0.577	0.605	0.698	0.832	0.648	0.834	0.624	0.309	0.758
0.744	0.650	0.692	0.566	0.764	0.759	0.757	0.714	0.861
0.756	0.554	0.917	0.907	0.479	0.552	0.258	0.810	0.639
0.739	0.615	0.798	0.742	0.728	0.684	0.847	0.852	0.621
0.868	0.665	0.524	0.588	0.823	0.765	0.392	0.776	0.748
0.703	0.655	0.728	0.658	0.667	0.808	0.848	0.715	0.361
0.682	0.762	0.651	0.724	0.652	0.844	0.678	0.609	0.615
0.813	0.934	0.818	0.554	0.753	0.479	0.909	0.614	0.625
0.734	0.830	0.891	0.764	0.525	0.681	0.693	0.765	0.651
0.795	0.742	0.751	0.858	0.765	0.829		0.423	0.716
0.745	0.699	0.703	0.701	0.663	0.629		0.542	0.572
0.762	0.904	0.765	0.873	0.717	0.482		0.527	0.534
0.843	0.620		0.812	0.833	0.872		0.578
0.819	0.859		0.809	0.466	0.773		0.451
	0.744		0.853	0.668	0.134		0.695
	0.363		0.890	0.732	0.702		0.598
	0.829		0.703	0.806	0.606		0.727
	0.806		0.848	0.803	0.830		0.634
	0.471		0.486	0.494	0.747
	0.491		0.649	0.544	0.605
	0.747		0.503	0.679	0.558
	0.690		0.857	0.492	0.584
	0.731		0.733		0.620
	0.645		0.428		0.738
	0.833		0.712
	0.429		0.821
	0.742		0.416
	0.638		0.587
	0.662		0.753
	0.758		0.818
	0.793		0.823
	0.799		0.688
	0.786		0.593
	0.685		0.652
	0.730		0.778
	0.586		0.410
			0.840
			0.680
			0.793
			0.661
			0.674
			0.654
			0.711
			0.698
