# Supplementary material for: Identification of functionally distinct macrophage subpopulations in Drosophila
Source: eLife. 2021 Apr 22;10:e58686. doi: 10.7554/eLife.58686 (PMC8062135; doi:10.7554/eLife.58686)
Supplement: Figure 8—figure supplement 1—source data 3. [file elife-58686-fig8-figsupp1-data3.csv]

Srp-GAL4 +	VT17559-GAL4 -	VT17559-GAL4 +	VT32897-GAL4 -	VT32897-GAL4 +	VT57089-GAL4 -	VT57089-GAL4 +	VT62766-GAL4 -	VT62766-GAL4 +
1.528	1.383	1.386	1.565	1.423	1.645	1.294	1.103	1.724
1.091	1.331	1.767	1.339	1.351	1.122	1.169	2.017	2.071
1.663	2.505	1.417	1.648	1.674	1.765	1.374	1.179	1.486
1.109	1.278	1.203	1.282	1.447	1.411	1.832	1.436	1.480
1.171	1.513	1.279	1.509	1.102	1.440	1.222	1.687	1.105
1.634	1.378	1.195	1.382	1.414	1.542	1.308	1.291	1.243
3.031	1.464	1.143	1.385	2.872	1.166	1.493	1.157	1.855
1.273	1.256	1.396	1.315	2.246	1.343	1.104	1.575	1.577
1.671	2.254	1.066	1.922	1.184	1.264	1.702	1.074	1.767
1.396	1.223	2.063	1.585	1.354	1.188	1.751	1.356	1.177
1.334	1.088	1.192	2.290	1.419	1.649	1.337	1.329	2.252
1.819	1.664	1.250	1.465	1.841	1.312	1.949	1.280	2.046
1.619	1.319	1.920	1.542	1.790	1.242		2.565	1.279
1.727	1.273	1.543	1.954	1.059	1.225		2.056	1.380
1.917	1.163	1.198	1.476	1.610	1.624		2.103	2.739
1.350	1.621		1.349	1.409	1.448		1.928
1.422	1.446		1.542	1.201	1.127		1.149
1.348	1.320		1.402	1.932	1.000		1.494
1.357	1.557		1.236	1.097	1.109		1.944
1.057	1.567		2.040	2.142	1.236		1.640
	1.401		1.393	1.849	1.510		1.405
	1.504		1.256	1.465	1.315
	1.828		1.710	2.897	1.241
	1.289		1.183	1.787	1.179
	1.280		1.346	1.379	1.937
	1.195		1.461		1.343
	1.743		1.521		1.775
	1.740		1.380
	2.609		1.207
	1.218		2.277
	1.432		1.831
	2.117		1.340
	1.671		1.274
	1.561		1.478
	1.417		1.475
	1.122		1.540
	1.660		1.355
	1.636		1.404
	1.292		1.387
	1.555		1.387
	1.200		1.203
	1.220		1.161
	1.036		1.653
	1.168		1.812
	1.253		1.437
	1.641		1.395
	1.374		1.739
	1.071
	1.314
	1.304
	1.207
	1.559
	1.279
	1.173
