# Supplementary material for: Identification of functionally distinct macrophage subpopulations in Drosophila
Source: eLife. 2021 Apr 22;10:e58686. doi: 10.7554/eLife.58686 (PMC8062135; doi:10.7554/eLife.58686)
Supplement: Figure 8—figure supplement 1—source data 4. [file elife-58686-fig8-figsupp1-data4.csv]

srp-GAL4 +	VT17559-GAL4 -	VT17559-GAL4 +	VT32897-GAL4 -	VT32897-GAL4 +	VT57089-GAL4 -	VT57089-GAL4 +	VT62766-GAL4 -	VT62766-GAL4 +
0.902	0.723	0.721	0.639	0.703	0.608	0.773	0.907	0.580
0.854	0.751	0.566	0.747	0.740	0.892	0.855	0.496	0.483
0.612	0.399	0.706	0.607	0.597	0.567	0.728	0.848	0.673
0.330	0.782	0.831	0.780	0.691	0.709	0.546	0.696	0.676
0.786	0.661	0.782	0.663	0.908	0.694	0.818	0.593	0.905
0.599	0.726	0.837	0.724	0.707	0.649	0.764	0.775	0.805
0.716	0.683	0.875	0.722	0.348	0.858	0.670	0.864	0.539
0.749	0.796	0.716	0.760	0.445	0.745	0.905	0.635	0.634
0.550	0.444	0.938	0.520	0.845	0.791	0.588	0.931	0.566
0.618	0.818	0.485	0.631	0.739	0.842	0.571	0.737	0.849
0.579	0.919	0.839	0.437	0.705	0.606	0.748	0.752	0.444
0.522	0.601	0.800	0.683	0.543	0.762	0.513	0.781	0.489
0.741	0.758	0.521	0.649	0.559	0.805		0.390	0.782
0.703	0.785	0.648	0.512	0.944	0.816		0.486	0.724
0.742	0.860	0.835	0.678	0.621	0.616		0.475	0.365
0.737	0.617		0.741	0.710	0.691		0.519
0.946	0.691		0.649	0.833	0.887		0.870
	0.757		0.713	0.518	1.000		0.669
	0.642		0.809	0.911	0.902		0.514
	0.638		0.490	0.467	0.809		0.610
	0.714		0.718	0.541	0.662		0.712
	0.665		0.796	0.682	0.761
	0.547		0.585	0.345	0.806
	0.776		0.845	0.560	0.848
	0.781		0.743	0.725	0.516
	0.837		0.684		0.744
	0.574		0.658		0.563
	0.575		0.725
	0.383		0.829
	0.821		0.439
	0.698		0.546
	0.472		0.747
	0.598		0.785
	0.641		0.676
	0.706		0.678
	0.891		0.649
	0.603		0.738
	0.611		0.712
	0.774		0.721
			0.721
			0.832
			0.862
			0.605
			0.552
			0.696
			0.717
			0.575
