# Supplementary material for: Identification of functionally distinct macrophage subpopulations in Drosophila
Source: eLife. 2021 Apr 22;10:e58686. doi: 10.7554/eLife.58686 (PMC8062135; doi:10.7554/eLife.58686)
Supplement: Figure 8—figure supplement 2—source data 1. [file elife-58686-fig8-figsupp2-data1.csv]

control (srp-GAL4)	VT17559-GAL4	VT32897-GAL4	VT57089-GAL4	VT62766-GAL4
2622.900000	2876.1140000	2013.071000	1596.001750	7483.138667
3687.233500	1444.1898000	1126.026000	2508.579500	3462.571353
1837.200654	2362.0078330	2499.457000	3179.539333	5368.424556
3290.163600	3227.6047500	1097.124000	2048.091000	5018.931857
3037.339214	2972.6445000	1044.640500	2201.441000	6035.337625
1508.422176	653.1811429	3057.825000	2393.349250	3384.026333
2022.956571	450.0256667	2070.010667	2697.823667	1157.093273
1852.243087	2134.4818330	1185.872333	2109.104800	1943.941188
2544.014118	1361.1655000	2226.293667	2491.667000	1111.236500
1808.420321	3606.4100000	2030.596667	1567.760750	1070.543000
2481.485462	5992.6700000	1582.267750	1926.406667	1400.009000
1928.437091			2170.628500	1277.517833
			1845.563000	1746.955455
			4165.417000	2047.920125
