# Supplementary material for: Identification of functionally distinct macrophage subpopulations in Drosophila
Source: eLife. 2021 Apr 22;10:e58686. doi: 10.7554/eLife.58686 (PMC8062135; doi:10.7554/eLife.58686)
Supplement: Figure 8—figure supplement 3—source data 1. [file elife-58686-fig8-figsupp3-data1.csv]

srp-GAL4	VT17559-GAL4	VT32897-GAL4	VT57089-GAL4	VT62766-GAL4
73.076923080	0.00000000	0.00000000	100.00000000	53.84615385
70.588235290	25.00000000	77.77777778	57.14285714	18.18181818
37.837837840	50.00000000	88.88888889	100.00000000	66.66666667
33.333333330	80.00000000	100.00000000	0.00000000	72.72727273
38.095238100	100.00000000	42.85714286	50.00000000	77.77777778
72.222222220	60.00000000	0.00000000	50.00000000	36.36363636
47.619047620	0.00000000	0.00000000	66.66666667	28.57142857
61.111111110	0.00000000	0.00000000	50.00000000	33.33333333
23.809523810	100.00000000	75.00000000	33.33333333	75.00000000
27.777777780	66.66666667	0.00000000	33.33333333	85.71428571
52.380952380	25.00000000	0.00000000	33.33333333	85.71428571
41.176470590	100.00000000	0.00000000	0.00000000	28.57142857
23.529411760	100.00000000	0.00000000	66.66666667	44.44444444
31.250000000	75.00000000	66.66666667	0.00000000	80.00000000
46.153846150	100.00000000	50.00000000	50.00000000	42.85714286
89.285714290	75.00000000	20.00000000	33.33333333	16.66666667
42.424242420	100.00000000	0.00000000	50.00000000	12.50000000
48.571428570	75.00000000	100.00000000	20.00000000	28.57142857
4.347826087	50.00000000	0.00000000	75.00000000	66.66666667
26.086956520	66.66666667	50.00000000	60.00000000	83.33333333
45.833333330	66.66666667	50.00000000	100.00000000	25.00000000
77.142857140	75.00000000	83.33333333	100.00000000	33.33333333
	100.00000000	80.00000000	100.00000000	66.66666667
	100.00000000	50.00000000	50.00000000	80.00000000
	0.00000000	25.00000000	0.00000000	0.00000000
	100.00000000	66.66666667	75.00000000	42.85714286
	100.00000000	100.00000000	57.14285714	66.66666667
	50.00000000	0.00000000	66.66666667	46.15384615
	0.00000000	100.00000000	60.00000000
	0.00000000	100.00000000
	100.00000000	50.00000000
		0.00000000
		0.00000000
		100.00000000
