# Supplementary material for: Identification of functionally distinct macrophage subpopulations in Drosophila
Source: eLife. 2021 Apr 22;10:e58686. doi: 10.7554/eLife.58686 (PMC8062135; doi:10.7554/eLife.58686)
Supplement: Figure 8—source data 1. [file elife-58686-fig8-data1.csv]

srp-GAL4	VT17559-GAL4	VT32897-GAL4	VT57089-GAL4	VT62766-GAL4
16.666666670	33.333333330	16.66666667	25.00000000	46.153846150
22.222222220	46.153846150	66.66666667	33.33333333	45.454545450
20.689655170	20.000000000	100.00000000	25.00000000	57.142857140
16.129032260	25.000000000	75.00000000	41.66666667	28.571428570
40.540540540	0.000000000	66.66666667	33.33333333	44.444444440
34.693877550	18.181818180	0.00000000	23.07692308	33.333333330
9.677419355	28.571428570	0.00000000	15.38461538	47.368421050
20.000000000	54.545454550	33.33333333	41.66666667	62.500000000
23.809523810	28.571428570	33.33333333	10.00000000	44.444444440
12.000000000	50.000000000	23.07692308	16.66666667	30.000000000
40.625000000	45.454545450	50.00000000	18.18181818	22.222222220
27.777777780	80.000000000	12.50000000	45.45454545	42.857142860
27.272727270	10.000000000	12.50000000	33.33333333	30.000000000
41.176470590	58.333333330	28.57142857	40.00000000	9.090909091
26.666666670	20.000000000	33.33333333	23.07692308	44.444444440
33.333333330	41.666666670	28.57142857	50.00000000	41.176470590
45.454545450	46.666666670	25.00000000	40.00000000	40.000000000
25.000000000	57.142857140	33.33333333	27.27272727	33.333333330
15.789473680	28.571428570	50.00000000	25.00000000	21.052631580
25.000000000	50.000000000	40.00000000	14.28571429	55.555555560
23.684210530	44.444444440	42.85714286	28.57142857	50.000000000
26.923076920		25.00000000	28.57142857	22.222222220
39.130434780			40.00000000	22.222222220
12.500000000			22.22222222	30.000000000
26.923076920			16.66666667	40.000000000
27.777777780			27.27272727
27.272727270
41.176470590
26.666666670
33.333333330
45.454545450
25.000000000
43.243243240
28.205128210
31.111111110
20.833333330
36.842105260
31.428571430
20.000000000
26.315789470
9.677419355
30.769230770
28.571428570
20.000000000
25.925925930
35.483870970
26.315789470
27.586206900
32.258064520
29.729729730
28.000000000
10.714285710
37.500000000
28.125000000
8.571428571
21.052631580
15.384615380
23.255813950
30.769230770
31.034482760
34.375000000
7.142857143
37.500000000
30.434782610
35.135135140
50.000000000
35.714285710
26.923076920
45.714285710
37.037037040
27.272727270
42.857142860
25.000000000
4.761904762
10.000000000
21.052631580
20.000000000
