# Supplementary material for: Identification of functionally distinct macrophage subpopulations in Drosophila
Source: eLife. 2021 Apr 22;10:e58686. doi: 10.7554/eLife.58686 (PMC8062135; doi:10.7554/eLife.58686)
Supplement: Figure 8—source data 2. [file elife-58686-fig8-data2.csv]

srp-GAL4	VT62766-GAL4	VT17559-GAL4	VT57089-GAL4	VT32897-GAL4
29.000000000	14.000000000	5.00000000	12.00000000	20.000000000
21.000000000	7.000000000	7.00000000	15.00000000	11.000000000
34.000000000	14.000000000	6.00000000	12.00000000	5.000000000
17.000000000	11.000000000	7.00000000	12.00000000	11.000000000
19.000000000	7.000000000	8.00000000	12.00000000	17.000000000
24.000000000	11.000000000	9.00000000	13.00000000	10.000000000
26.000000000	8.000000000	8.00000000	6.00000000	14.000000000
34.000000000	13.000000000	8.00000000	11.00000000	17.000000000
36.000000000	5.000000000	8.00000000	12.00000000	11.000000000
28.000000000	4.000000000	5.00000000	10.00000000	15.000000000
28.000000000	3.000000000	7.00000000	12.00000000	3.000000000
23.000000000	11.000000000	6.00000000	11.00000000	4.000000000
22.000000000	8.000000000	6.00000000	11.00000000	3.000000000
29.000000000	7.000000000	3.00000000	12.00000000	8.000000000
28.000000000	5.000000000	4.00000000	15.00000000	10.000000000
32.000000000	11.000000000	4.00000000	13.00000000	11.000000000
30.000000000	6.000000000	3.00000000	6.00000000	12.000000000
28.000000000	10.000000000	8.00000000	10.00000000	21.000000000
24.000000000	11.000000000	4.00000000	11.00000000	13.000000000
24.000000000	13.000000000	1.00000000	12.00000000	11.000000000
30.000000000	18.000000000	3.00000000	8.00000000	14.000000000
32.000000000	11.000000000	3.00000000	7.00000000	7.000000000
23.000000000	5.000000000	13.00000000	14.00000000	9.000000000
28.000000000	10.000000000	8.00000000	7.00000000	12.000000000
27.000000000	11.000000000	8.00000000	15.00000000	10.000000000
22.000000000	12.000000000	4.00000000	9.00000000	19.000000000
21.000000000	5.000000000	8.00000000	6.00000000	16.000000000
28.000000000	12.000000000	7.00000000	3.00000000	9.000000000
45.000000000	15.000000000	6.00000000	11.00000000	10.000000000
22.000000000	7.000000000	7.00000000	15.00000000	9.000000000
34.000000000	8.000000000	4.00000000		7.000000000
24.000000000	7.000000000	6.00000000		10.000000000
35.000000000	6.000000000	8.00000000		11.000000000
26.000000000	9.000000000	2.00000000		9.000000000
25.000000000	6.000000000	5.00000000		17.000000000
31.000000000		7.00000000		15.000000000
29.000000000		4.00000000		19.000000000
29.000000000				18.000000000
24.000000000				15.000000000
28.000000000				18.000000000
28.000000000				9.000000000
21.000000000				9.000000000
22.000000000				10.000000000
17.000000000				15.000000000
38.000000000
42.000000000
32.000000000
34.000000000
37.000000000
24.000000000
44.000000000
34.000000000
16.000000000
13.000000000
13.000000000
29.000000000
36.000000000
39.000000000
31.000000000
18.000000000
29.000000000
31.000000000
37.000000000
49.000000000
31.000000000
20.000000000
21.000000000
25.000000000
32.000000000
36.000000000
22.000000000
17.000000000
30.000000000
15.000000000
30.000000000
11.000000000
33.000000000
33.000000000
28.000000000
19.000000000
20.000000000
38.000000000
26.000000000
23.000000000
32.000000000
26.000000000
32.000000000
37.000000000
39.000000000
40.000000000
38.000000000
45.000000000
48.000000000
38.000000000
35.000000000
40.000000000
38.000000000
31.000000000
26.000000000
21.000000000
46.000000000
27.000000000
31.000000000
19.000000000
29.000000000
31.000000000
37.000000000
25.000000000
28.000000000
16.000000000
32.000000000
32.000000000
61.000000000
35.000000000
38.000000000
39.000000000
28.000000000
43.000000000
39.000000000
29.000000000
32.000000000
28.000000000
24.000000000
23.000000000
37.000000000
32.000000000
17.000000000
42.000000000
26.000000000
35.000000000
27.000000000
33.000000000
35.000000000
32.000000000
30.000000000
42.000000000
20.000000000
38.000000000
40.000000000
