# Supplementary material for: Identification of functionally distinct macrophage subpopulations in Drosophila
Source: eLife. 2021 Apr 22;10:e58686. doi: 10.7554/eLife.58686 (PMC8062135; doi:10.7554/eLife.58686)
Supplement: Figure 8—source data 3. [file elife-58686-fig8-data3.csv]

srp-GAL4	VT17559-GAL4	VT32897-GAL4	VT57089-GAL4	VT62766-GAL4
2.287561000	3.225625000	2.801333000	3.729000000	2.959000000
2.353488000	3.164167000	2.763077000	2.834500000	3.682609000
2.559524000	3.890833000	2.982143000	3.362727000	3.492083000
3.340698000	3.500909091	3.235000000	2.836364000	3.040833000
3.469024000	3.480000000	2.845556000	3.304706000	3.673636000
2.914259000	3.154615385	3.358333000	2.568696000	3.016471000
2.483636364	2.504285714	2.570000000	3.063846154	3.175000000
2.670606061	3.754000000	2.172857143	2.395000000	2.531538462
2.521754386	2.700967742	2.334000000	2.296666667	3.000000000
2.293125000	2.554000000	2.770000000	2.140384615	3.535882353
2.697755102	3.712727273	2.305000000	2.509230769	3.275517241
2.573018868	2.541176471	2.080000000	2.795000000	3.075882353
3.213541667	3.766666667	3.179230770	2.188000000	3.104166667
3.322000000	2.657500000	1.943076920	2.943636360	2.837647059
2.737777778	2.414444440	2.681304350	2.795000000	3.516470588
3.204081633	3.832222220	3.909166670	2.586923080	2.190000000
2.822549020	3.701538460	3.415384620	3.423125000	2.863636364
1.829433962	3.529333330		3.813333330	2.743076923
2.055319149	3.654375000		3.490000000	3.428750000
3.557619048			3.285769230	1.756250000
2.946530612			2.470000000
