# Supplementary material for: Identification of functionally distinct macrophage subpopulations in Drosophila
Source: eLife. 2021 Apr 22;10:e58686. doi: 10.7554/eLife.58686 (PMC8062135; doi:10.7554/eLife.58686)
Supplement: Figure 8—source data 5. [file elife-58686-fig8-data5.csv]

srp-GAL4	VT17559-GAL4	VT32897-GAL4	VT57089-GAL4	VT62766-GAL4
3.800000000	3.000000000	7.000000000	3.750000000	4.500000000
4.142857143	3.500000000	6.333333333	5.000000000	4.000000000
5.800000000	3.000000000	4.000000000	3.000000000	4.333333333
4.625000000	3.000000000	3.000000000	2.750000000	3.666666667
4.000000000	5.000000000	3.333333333	5.000000000	5.000000000
5.571428571	3.000000000	4.000000000	3.666666667	3.666666667
4.125000000	3.500000000	5.000000000	3.750000000	4.000000000
5.000000000	4.500000000	3.750000000	4.500000000	3.750000000
5.750000000	3.666666667	4.500000000	4.333333333	4.000000000
4.857142857	4.000000000	5.500000000	4.000000000	2.666666667
4.333333333		4.000000000	3.500000000	3.428571429
3.900000000		3.500000000	4.200000000	3.500000000
4.571428571			4.000000000	3.333333333
4.428571429			3.333333333	4.000000000
3.800000000			5.000000000	5.000000000
4.500000000			2.600000000	3.000000000
5.166666667			3.500000000	3.800000000
6.000000000			2.750000000	3.666666667
3.600000000			3.750000000	3.000000000
4.500000000			4.500000000	3.000000000
2.200000000			3.333333333	3.500000000
3.875000000			5.000000000	4.000000000
4.166666667			5.166666667	4.200000000
4.333333333			3.500000000	3.285714286
3.500000000			3.500000000	4.500000000
2.200000000			5.000000000	4.400000000
3.750000000			4.333333333	3.666666667
3.800000000			4.333333333	3.500000000
4.000000000			4.750000000	4.857142857
2.666666667				4.250000000
5.571428571				4.333333333
5.111111111
5.400000000
5.000000000
5.000000000
5.625000000
5.100000000
5.300000000
6.428571429
4.272727273
6.000000000
4.250000000
4.555555556
4.583333333
4.545454545
5.230769231
4.833333333
4.000000000
4.777777778
5.428571429
4.200000000
4.538461538
4.545454545
5.142857143
4.600000000
6.142857143
5.285714286
4.428571429
4.545454545
5.875000000
4.000000000
2.857142857
3.888888889
4.375000000
5.600000000
4.555555556
4.500000000
3.750000000
4.600000000
4.857142857
3.777777778
4.909090909
5.142857143
4.666666667
4.125000000
5.400000000
