# Supplementary material for: Identification of functionally distinct macrophage subpopulations in Drosophila
Source: eLife. 2021 Apr 22;10:e58686. doi: 10.7554/eLife.58686 (PMC8062135; doi:10.7554/eLife.58686)
Supplement: Figure 8—source data 6. [file elife-58686-fig8-data6.csv]

srp	VT17559	VT32897	VT57089	VT62766
2.553968	1.681818	1.166667	1.472527	0.75000000
3.105263	1.769231	1.600000	1.666667	1.20000000
3.633333	1.833333	1.600000	2.000000	1.66666700
4.500000	2.033333	1.600000	2.687500	1.66666700
	2.375000	1.713023	3.197479	1.75000000
	3.015025	2.217391		2.35384600
		2.400000		2.37037000
		2.666667		2.50000000
				2.50000000
				3.22222200
				3.22222200
				3.35566200
