# Supplementary material for: Identification of functionally distinct macrophage subpopulations in Drosophila
Source: eLife. 2021 Apr 22;10:e58686. doi: 10.7554/eLife.58686 (PMC8062135; doi:10.7554/eLife.58686)
Supplement: Supplementary file 1. [file elife-58686-supp1.xlsx]

## Sheet: Sheet1
Supplementary File 1. Genotypes and sources of fly lines used in this study
Figure	abbreviation/label	genotype	source(s)	reference(s)	notes
Figure 1a	srpHemo>GFP/srpHemo>red stinger	w;srpHemo-GAL4,UAS-GFP/srpHemo-GAL4,UAS-red stinger	from Will Wood, University of Edinburgh, UK	Bruckner et al., 2004 (srpHemo-GAL4); Stramer et al., 2010 (UAS-red stinger)
Figure 1b-d	crq>GFP	w;crq-GAL4,UAS-GFP	from Will Wood, University of Edinburgh, UK	Stramer et al., 2005 (crq-GAL4)
Figure 1e	srpHemo-3x-mCh/da>GC3ai	w;;srpHemo-3x-mCherry/da-GAL4,UAS-GC3ai	srpHemo-3x-mCherry on chromosome 3 from Daria Siekhaus, IST Vienna, Austria; UAS-GC3ai from Magali Suzanne/Bruno Monier, Toulouse, France; da-GAL4 from Alex Whitworth, University of Cambridge, UK	Gyoergy et al., 2018 (srpHemo-3x-mCherry); Schott et al., 2018 (UAS-GC3ai); Wodarz et al., 1996 (da-GAL4)
Figure 1f	Hml(D)>GFP	w;Hml(D)-GAL4,UAS-GFP;Hml(D)-GAL4,UAS-GFP	Line derived from Bloomington Stock Centre (Indiana, USA) lines BL30140 and BL30142	Sinenko and Mathey-Prevot, 2004
Figure 2a	VT41692-GAL4	y w;;VT41692-GAL4	Originally from VDRC, no longer available (available on request from I. Evans, University of Sheffield, UK)	Kvon et al., 2014	in attP2
Figure 2a	VT17559-GAL4	y w;;VT17559-GAL4	Originally from VDRC, no longer available (available on request from I. Evans, University of Sheffield, UK)	Kvon et al., 2014	in attP2
Figure 2a	VT32897-GAL4	y w;;VT32897-GAL4	Originally from VDRC, no longer available (available on request from I. Evans, University of Sheffield, UK)	Kvon et al., 2014	in attP2
Figure 2a	VT57089-GAL4	y w;;VT57089-GAL4	Originally from VDRC, no longer available (available on request from I. Evans, University of Sheffield, UK)	Kvon et al., 2014	in attP2
Figure 2a	VT62766-GAL4	y w;;VT62766-GAL4	Originally from VDRC, no longer available (available on request from I. Evans, University of Sheffield, UK)	Kvon et al., 2014	in attP2
Figure 2c	negative control (no GAL4)	w;+/UAS-tdTomato;srpHemo-GMA	UAS-tdTomato from Bloomington Stock Centre (BL36327), Indiana, USA; srpHemo-GMA on chromosome 3 from James Bloor, University of Kent, UK
Figure 2d	positive control (srpHemo-GAL4)	w;srpHemo-GAL4/UAS-tdTomato;srpHemo-GMA
Figure 2e	VT17559-GAL4	w;srpHemo-GMA/UAS-tdTomato;VT17559-GAL4/srpHemo-GMA	srpHemo-GMA on chromosome 2 from James Bloor, University of Kent, UK
Figure 2e	VT32897-GAL4	w;srpHemo-GMA/UAS-tdTomato;VT32897-GAL4/srpHemo-GMA
Figure 2e	VT57089-GAL4	w;srpHemo-GMA/UAS-tdTomato;VT57089-GAL4/srpHemo-GMA
Figure 2e	VT62766-GAL4	w;srpHemo-GMA/UAS-tdTomato;VT62766-GAL4/srpHemo-GMA
Figure 2f,h	VT17559-GAL4	w;UAS-EGFP;VT17559-GAL4	UAS-EGFP from Bloomington Stock Centre (BL5431), Indiana, USA
Figure 2f,h	VT32897-GAL4 or VT32897	w;UAS-EGFP;VT32897-GAL4
Figure 2f,h	VT57089-GAL4 or VT57089	w;UAS-EGFP;VT57089-GAL4
Figure 2f,h	VT62766-GAL4 or VT62766	w;UAS-EGFP;VT62766-GAL4
Figure 2g,h	srpHemo-GAL4 or srp	w;srpHemo-GAL4,UAS-GFP
Figure 2 - Figure Supplement 1a	w1118	w,eater-GFP/w	eater-GFP on X from Laura Vesala, University of Tampere, Finland	Sorrentino et al., 2007
Figure 2 - Figure Supplement 1b-c	17559-RFP	w,eater-GFP/w;;VT15559-RFP/+	VT17559-RFP made in this study along with VT32897-RFP, VT57089-RFP and VT62766-RFP (available on request from I. Evans, University of Sheffield, UK)		inserted in attP2
Figure 2 - Figure Supplement 2a	w1118 control	w;;simu-cytGFP/+	simu-cytGFP from Estee Kurant, University of Haifa, Israel	Kurant et al., 2008
Figure 2 - Figure Supplement 2a	VT17559-RFP	w;;simu-cytGFP/VT17559-RFP
Figure 2 - Figure Supplement 2a	VT32897-RFP	w;;simu-cytGFP/VT32897-RFP
Figure 2 - Figure Supplement 2a-a'	VT57089-RFP	w;;simu-cytGFP/VT57089-RFP
Figure 2 - Figure Supplement 2a-a'	VT62766-RFP	w;;simu-cytGFP/VT62766-RFP
Figure 2 - Figure Supplement 2b-b'	w1118 control	w;;crq-GAL4,UAS-GFP/+
Figure 2 - Figure Supplement 2b-b'	VT17559-RFP	w;;crq-GAL4,UAS-GFP/VT17559-RFP
Figure 2 - Figure Supplement 2b-b'	VT32897-RFP	w;;crq-GAL4,UAS-GFP/VT32897-RFP
Figure 2 - Figure Supplement 2b-b'	VT57089-RFP	w;;crq-GAL4,UAS-GFP/VT57089-RFP
Figure 2 - Figure Supplement 2b-b'	VT62766-RFP	w;;crq-GAL4,UAS-GFP/VT62766-RFP
Figure 2 - Figure Supplement 2c	crq-GAL4,UAS-GFP	w;;crq-GAL4,UAS-GFP/+
Figure 2 - Figure Supplement 2c	simu-GFP	w;;simu-cytGFP/+
Figure 3a-c	srpHemo-AD;srpHemo-DBD	w;srpHemo-AD/srpHemo-H2A-3x-mCherry,UAS-stinger;srpHemo-DBD/+	srpHemo-AD and srpHemo-DBD made in this study (available on request from I. Evans, University of Sheffield, UK); UAS-stinger from Bloomington Stock Centre (BL84277), Indiana, USA		srpHemo-AD in VK1, srpHemo-DBD in attP2
Figure 3a-c	srpHemo-AD;17559-DBD	w;srpHemo-AD/srpHemo-H2A-3x-mCherry,UAS-stinger;VT17559-DBD/+	VT17559-DBD made in this study (available on request from I. Evans, University of Sheffield, UK)		srpHemo-AD in VK1, VT17559-DBD in attP2
Figure 3a-c	srpHemo-AD;32897-DBD	w;srpHemo-AD/srpHemo-H2A-3x-mCherry,UAS-stinger;VT32897-DBD/+	VT32897-DBD made in this study (available on request from I. Evans, University of Sheffield, UK)		srpHemo-AD in VK1, VT32897-DBD in attP2
Figure 3a-c	srpHemo-AD;57089-DBD	w;srpHemo-AD/srpHemo-H2A-3x-mCherry,UAS-stinger;VT57089-DBD/+	VT57089-DBD made in this study (available on request from I. Evans, University of Sheffield, UK)		srpHemo-AD in VK1, VT57089-DBD in attP2
Figure 3a-c	srpHemo-AD;62766-DBD	w;srpHemo-AD/srpHemo-H2A-3x-mCherry,UAS-stinger;VT62766-DBD/+	VT62766-DBD made in this study (available on request from I. Evans, University of Sheffield, UK)		srpHemo-AD in VK1, VT62766-DBD in attP2
Figure 3c	w control	w;srpHemo-H2A-3x-mCherry,UAS-stinger/+
Figure 3 - Figure Supplement 1b-d	VT62766	w;srpHemo-AD/srpHemo-H2A-3x-mCherry,UAS-stinger;VT62766-DBD/+
Figure 3 - Figure Supplement 1e-g	VT17559-DBD	w;srpHemo-AD/srpHemo-H2A-3x-mCherry,UAS-stinger;VT17559-DBD/+
Figure 3 - Figure Supplement 1e-g	VT32897-DBD	w;srpHemo-AD/srpHemo-H2A-3x-mCherry,UAS-stinger;VT32897-DBD/+
Figure 3 - Figure Supplement 1e-g	VT57089-DBD	w;srpHemo-AD/srpHemo-H2A-3x-mCherry,UAS-stinger;VT57089-DBD/+
Figure 3 - Figure Supplement 1e-g	VT62766-DBD	w;srpHemo-AD/srpHemo-H2A-3x-mCherry,UAS-stinger;VT62766-DBD/+
Figure 4a	w1118 negative control	w;UAS-stinger/+
Figure 4b	srpHemo-AD;srpHemo-DBD	w;srpHemo-AD/UAS-stinger;srpHemo-DBD/+
Figure 4c, g-h'	srpHemo-AD;VT17559-DBD	w;srpHemo-AD/UAS-stinger;VT17559-DBD/+
Figure 4d, g-h'	srpHemo-AD;VT32897-DBD	w;srpHemo-AD/UAS-stinger;VT32897-DBD/+
Figure 4d, g-h'	srpHemo-AD;VT57089-DBD	w;srpHemo-AD/UAS-stinger;VT57089-DBD/+
Figure 4e, g-h'	srpHemo-AD;VT62766-DBD	w;srpHemo-AD/UAS-stinger;VT62766-DBD/+
Figure 4h-h'	Hml(D)-GAL4	w;Hml(D)-GAL4,UAS-GFP;Hml(D)-GAL4,UAS-GFP
Figure 4 - Figure Supplement 1a	UAS-stinger;+	w;UAS-stinger
Figure 4 - Figure Supplement 1a	UAS-stinger;VT17559-GAL4	w;UAS-stinger;VT17559-GAL4
Figure 4 - Figure Supplement 1a	UAS-stinger;VT32897-GAL4	w;UAS-stinger;VT32897-GAL4
Figure 4 - Figure Supplement 1a	UAS-stinger;VT57089-GAL4	w;UAS-stinger;VT57089-GAL4
Figure 4 - Figure Supplement 1a	UAS-stinger;VT62766-GAL4	w;UAS-stinger;VT62766-GAL4
Figure 4 - Figure Supplement 1c	srp-AD;srp-DBD	w;srpHemo-AD/+;srpHemo-DBD/UAS-red stinger,UAS-FLP,Ubi-p63E(FRT.STOP)Stinger	G-TRACE line w;;UAS-red stinger,UAS-FLP,Ubi-p63E(FRT.STOP)Stinger (Bloomington line BL28281) kindly provided by Alisson Gontijo, CEDOC, Lisbon, Portugal	Evans et al., 2009
Figure 4 - Figure Supplement 1c	srp-AD;VT17559-DBD	w;srpHemo-AD/+;VT17559-DBD/UAS-red stinger,UAS-FLP,Ubi-p63E(FRT.STOP)Stinger
Figure 4 - Figure Supplement 1c	srp-AD;VT32897-DBD	w;srpHemo-AD/+;VT32897-DBD/UAS-red stinger,UAS-FLP,Ubi-p63E(FRT.STOP)Stinger
Figure 4 - Figure Supplement 1c	srp-AD;VT57089-DBD	w;srpHemo-AD/+;VT57089-DBD/UAS-red stinger,UAS-FLP,Ubi-p63E(FRT.STOP)Stinger
Figure 4 - Figure Supplement 1c	srp-AD;VT62766-DBD	w;srpHemo-AD/+;VT62766-DBD/UAS-red stinger,UAS-FLP,Ubi-p63E(FRT.STOP)Stinger
Figure 5a-f	labels as per Figure 4	genotypes as per Figure 4
Figure 6a-f	labels as per Figure 4	genotypes as per Figure 4
Figure 7a	srpHemo-3x-mCherry	w;;+/srpHemo-3x-mCherry	srpHemo-3x-mCherry on chromosome 2 from Daria Siekhaus, IST Vienna, Austria	Gyoergy et al., 2018
Figure 7b-e	labels as per Figure 4	genotypes as per Figure 4
Figure 7f	w1118 negative control	w;srpHemo-H2A-3x-mCherry,UAS-stinger/+
Figure 7f	srp-AD;VT17559-DBD	w;srpHemo-AD/srpHemo-H2A-3x-mCherry,UAS-stinger;VT17559-DBD/+
Figure 7f	srp-AD;VT32897-DBD	w;srpHemo-AD/srpHemo-H2A-3x-mCherry,UAS-stinger;VT32897-DBD/+
Figure 7f	srp-AD;VT57089-DBD	w;srpHemo-AD/srpHemo-H2A-3x-mCherry,UAS-stinger;VT57089-DBD/+
Figure 7f	srp-AD;VT62766-DBD	w;srpHemo-AD/srpHemo-H2A-3x-mCherry,UAS-stinger;VT62766-DBD/+
Figure 8a-k	srpHemo-GAL4 or srp-GAL4	w;srpHemo-GAL4/UAS-stinger
Figure 8a-k	VT17559-GAL4	w;+/UAS-stinger;VT17559-GAL4/+
Figure 8a-k	VT32897-GAL4	w;+/UAS-stinger;VT32897-GAL4/+
Figure 8a-k	VT57089-GAL4	w;+/UAS-stinger;VT57089-GAL4/+
Figure 8a-k	VT62766-GAL4	w;+/UAS-stinger;VT62766-GAL4/+
Figure 8l	srp	w;srpHemo-AD/UAS-GFP-myc-2xFYVE;srpHemo-DBD/+	UAS-GFP-myc-2xFYVE on chromosome 2 from Bloomington Stock Centre (BL42712)	Wucherpfennig et al., 2003
Figure 8l	VT17559	w;srpHemo-AD/UAS-GFP-myc-2xFYVE;VT17559-DBD/+
Figure 8l	VT32897	w;srpHemo-AD/UAS-GFP-myc-2xFYVE;VT32897-DBD/+
Figure 8l	VT57089	w;srpHemo-AD/UAS-GFP-myc-2xFYVE;VT57089-DBD/+
Figure 8l	VT62766	w;srpHemo-AD/UAS-GFP-myc-2xFYVE;VT62766-DBD/+
Figure 8 - Figure Supplements 1-3	srpHemo-GAL4 or srpHemo-GAL4 control or srp-GAL4	w;srpHemo-GAL4/UAS-tdTomato;srpHemo-GMA			+ refers to cells with tdTomato and GMA expression
Figure 8 - Figure Supplements 1-3	VT17559-GAL4	w;srpHemo-GMA/UAS-tdTomato;srpHemo-GMA/VT17559-GAL4			+ refers to cells with tdTomato and GMA expression, - refers to cells with GMA expression but without tdTomato
Figure 8 - Figure Supplements 1-3	VT32897-GAL4	w;srpHemo-GMA/UAS-tdTomato;srpHemo-GMA/VT32897-GAL4			+ refers to cells with tdTomato and GMA expression, - refers to cells with GMA expression but without tdTomato
Figure 8 - Figure Supplements 1-3	VT57089-GAL4	w;srpHemo-GMA/UAS-tdTomato;srpHemo-GMA/VT57089-GAL4			+ refers to cells with tdTomato and GMA expression, - refers to cells with GMA expression but without tdTomato
Figure 8 - Figure Supplements 1-3	VT62766-GAL4	w;srpHemo-GMA/UAS-tdTomato;srpHemo-GMA/VT62766-GAL4			+ refers to cells with tdTomato and GMA expression, - refers to cells with GMA expression but without tdTomato
Figure 9b-c	control	w;srpHemo-GAL4,UAS-GFP/+;crq-GAL4,UAS-GFP/+
Figure 9b-c	hc>Cnx14D	w,UAS-Cnx14D/w;srpHemo-GAL4,UAS-GFP/+;crq-GAL4,UAS-GFP/+	UAS-Cnx14D from Harvard stock centre (d04188), Boston, USA
Figure 10a	control	w;;crq-GAL4,UAS-GFP
Figure 10b	repo mutant	w;;repo03702,crq-GAL4,UAS-GFP	repo03702 from Bloomington Stock Centre (BL11604), Indiana, USA	Halter et al., 1995	ry506 allele recombined off (Armitage et al., 2020)
Figure 10c	negative control (no VT-GAL4)	w;srpHemo-H2A-3x-mCherry/+	srpHemo-H2A-3x-mCherry on chromosome 2 from Daria Siekhaus, IST Vienna, Austria	Gyoergy et al., 2018
Figure 10d,h	VT17559-GAL4 control	w;UAS-stinger/srpHemo-H2A-3x-mCherry;VT17559-GAL4/+
Figure 10d',h	VT17559-GAL4,repo	w;UAS-stinger/srpHemo-H2A-3x-mCherry;VT17559-GAL4,repo03702/repo03702
Figure 10e,h	VT32897-GAL4 control	w;UAS-stinger/srpHemo-H2A-3x-mCherry;VT32897-GAL4/+
Figure 10e',h	VT32897-GAL4,repo	w;UAS-stinger/srpHemo-H2A-3x-mCherry;VT32897-GAL4,repo03702/repo03702
Figure 10f,h	VT57089-GAL4 control	w;UAS-stinger/srpHemo-H2A-3x-mCherry;VT57089-GAL4/+
Figure 10f',h	VT57089-GAL4,repo	w;UAS-stinger/srpHemo-H2A-3x-mCherry;VT57089-GAL4,repo03702/repo03702
Figure 10g-h	VT62766-GAL4 control	w;UAS-stinger/srpHemo-H2A-3x-mCherry;VT62766-GAL4/+
Figure 10g'-h	VT62766-GAL4,repo	w;UAS-stinger/srpHemo-H2A-3x-mCherry;VT62766-GAL4,repo03702/repo03702
Videos	abbreviation/label	genotype	source(s)	reference(s)	notes
Video 1	srp>GFP/srp>red stinger	w;srpHemo-GAL4,UAS-GFP/srpHemo-GAL4,UAS-red stinger			embryonic wound
Video 2 (top left)	VT17559	w;srpHemo-AD/srpHemo-H2A-3x-mCherry,UAS-stinger;VT17559-DBD/+			L1 larva; Stinger channel only
Video 2 (top right)	VT32897	w;srpHemo-AD/srpHemo-H2A-3x-mCherry,UAS-stinger;VT32897-DBD/+			L1 larva; Stinger channel only
Video 2 (bottom left)	VT57089	w;srpHemo-AD/srpHemo-H2A-3x-mCherry,UAS-stinger;VT57089-DBD/+			L1 larva; Stinger channel only
Video 2 (bottom right)	VT62766	w;srpHemo-AD/srpHemo-H2A-3x-mCherry,UAS-stinger;VT62766-DBD/+			L1 larva; Stinger channel only
Video 3	srp	w;srpHemo-AD/srpHemo-H2A-3x-mCherry,UAS-stinger;srpHemo-DBD/+			L3 larva; Stinger channel only
Video 4 (top left)	VT17559	w;srpHemo-AD/srpHemo-H2A-3x-mCherry,UAS-stinger;VT17559-DBD/+			L3 larva; Stinger channel only
Video 4 (top right)	VT32897	w;srpHemo-AD/srpHemo-H2A-3x-mCherry,UAS-stinger;VT32897-DBD/+			L3 larva; Stinger channel only
Video 4 (bottom left)	VT57089	w;srpHemo-AD/srpHemo-H2A-3x-mCherry,UAS-stinger;VT57089-DBD/+			L3 larva; Stinger channel only
Video 4 (bottom right)	VT62766	w;srpHemo-AD/srpHemo-H2A-3x-mCherry,UAS-stinger;VT62766-DBD/+			L3 larva; Stinger channel only
Video 5	srp	w;srpHemo-AD/UAS-stinger;srpHemo-DBD/+			WPP
Video 6	VT57089	w;srpHemo-AD/UAS-stinger;VT57089-DBD/+			WPP
Video 7	VT32897	w;srpHemo-AD/UAS-stinger;VT32897-DBD/+			WPP
nb1 w=w1118 allele unless stated
nb2 source/reference/notes only shown on first instance in table
nb3 srpHemo-AD and srpHemo-DBD abbreviated to srp-AD and srp-DBD for reasons of space on graphs
