# Supplementary material for: Identification of functionally distinct macrophage subpopulations in Drosophila
Source: eLife. 2021 Apr 22;10:e58686. doi: 10.7554/eLife.58686 (PMC8062135; doi:10.7554/eLife.58686)
Supplement: Table 1—source data 1. — Summary of plasmatocyte subpopulation characteristics and their developmental regulation. [file elife-58686-table1-data1.xlsx]

## Sheet: Sheet1
Table 1. Summary of plasmatocyte subpopulation characteristics and their developmental regulation
	Subpopulation characteristics (compared to overall population):						Subpopulations in:
Subpopulation	Wound responses	Migration speed	Efferocytosis	ROS levels	Phagocytosis of E. coli		Embryos	Larvae	Pupae	Newly hatched adults	Aged adults
VT17559				no difference	no difference		distinct subpopulation	very few cells labelled	large numbers labelled by 18h APF	large numbers present	largely absent by 2 weeks
VT32897		no difference	only decreased in FYVE	no difference	no difference		distinct subpopulation (fewest cells)	few cells labelled + nephrocytes & garland cells (?)	large numbers labelled by 72h APF	large numbers present	labelled cells persist
VT57089	no difference	no difference		no difference	no difference		distinct subpopulation	almost no cells labelled + Bolwig Organ (?)	steady increase in numbers labelled	large numbers present	largely absent by 1 week
VT62766		no difference		no difference	no difference		distinct subpopulation	almost no cells labelled	large numbers labelled by 48h APF	large numbers present	largely absent by 1 week
