# Supplementary material for: Identification of functionally distinct macrophage subpopulations in Drosophila
Source: eLife. 2021 Apr 22;10:e58686. doi: 10.7554/eLife.58686 (PMC8062135; doi:10.7554/eLife.58686)
Supplement: Table 2—source data 1. — VT enhancer region location and neighbouring genes. [file elife-58686-table2-data1.xlsx]

## Sheet: Sheet1
Table 2. VT enhancer region location and neighbouring genes
VT enhancer	Genomic region*	Nearest genes	Distance of enhancer from gene
VT17559	chr2R: 12,069,698–12,070,780	Lis-1	overlapping
		CG8441	2,929bp upstream
		Ptp52F	3,887bp downstream
VT32897	chr3L: 18,631,149–18,633,281	MYPT-75D	overlapping
		bora	13,299bp downstream
		not	15,921bp downstream
VT57089	chrX: 4,961,770–4,962,316	ovo	overlapping
		CG32767	3,290bp upstream
		CR44833	3,870bp downstream
VT62766	chrX: 16,406,666–16,408,777	para	overlapping
		Cnx14D	10,404bp upstream
		CG9903	26,520bp upstream
* D. melanogaster Apr. 2006 (BDGP R5/dm3) Assembly
Data taken from http://enhancers.starklab.org/
